# Supplementary material for: Advanced MRI Assessment during Dendritic Cell Immunotherapy Added to Standard Treatment against Glioblastoma
Source: J Clin Med. 2019 Nov 17;8(11):2007. doi: 10.3390/jcm8112007 (PMC6912338; doi:10.3390/jcm8112007)
Supplement: Supplementary file 1 [file jcm-08-02007-s001.pdf]

**Table S1.** Normalized CBV and ADC values before and during immunotherapy.

|                            | High/LowNK | aMRI-T0                       | aMRI-T2                       | aMRI-T4                       | aMRI-T12         |
|----------------------------|------------|-------------------------------|-------------------------------|-------------------------------|------------------|
| <b>rCBV<sub>mean</sub></b> | HighNK     | 3.53 (0.56–9.45)              | 2.42 (0.6–8.66)               | 3.54 (0.76–7.97)              | 2.25 (0.7–4.8)   |
|                            | LowNK      | 3.83 (2.25–7.51)              | 3.46 (1.51–5.89)              | 3.73 (1.08–4.98)              | -                |
| <b>rCBV<sub>max</sub></b>  | HighNK     | 5.29 (0.56–10.55)             | 3.29 (0.92–14.14)             | 3.79 (0.76–10.04)             | 2.6 (0.71–6.89)  |
|                            | LowNK      | 5.25 (2.27–9.69)              | 3.91 (3.46–9.28)              | 4.85 (1.08–6.82)              | -                |
| <b>rADC<sub>mean</sub></b> | HighNK     | 1.24 (0.92–1.53) <sup>a</sup> | 1.06 (0.76–1.51) <sup>b</sup> | 1.08 (0.83–1.62) <sup>c</sup> | 1.13 (0.94–1.6)  |
|                            | LowNK      | 1.02 (0.81–2.6)               | 1.18 (0.85–1.95)              | 1.1 (0.84–1.26)               | 1.02 (0.81–2.6)  |
| <b>rADC<sub>min</sub></b>  | HighNK     | 1.15 (0.82–1.47) <sup>d</sup> | 1.01 (0.76–1.51) <sup>e</sup> | 0.97 (0.67–1.34) <sup>f</sup> | 1.02 (0.85–1.32) |
|                            | LowNK      | 0.97 (0.69–1.61)              | 1 (0.82–1.47)                 | 1.02 (0.85–1.32)              |                  |

Note: a-b, p = 0.02; a-c, p = 0.023; d-e, p = 0.003; d-f, p = 0.005.

**Table S2.** CBV and ADC values with range observed two months before, during and two months after PsP.

|                            | MRI <sub>prePsP</sub> | MRI <sub>PsP</sub> | MRI <sub>postPsP</sub> | $\Delta(\text{MRI}_{\text{PsP}} - \text{MRI}_{\text{prePsP}})$ | $\Delta(\text{MRI}_{\text{postPsP}} - \text{MRI}_{\text{PsP}})$ |
|----------------------------|-----------------------|--------------------|------------------------|----------------------------------------------------------------|-----------------------------------------------------------------|
| <b>rCBV<sub>mean</sub></b> | 4.38 (0.99–8.66)      | 3.5 (0.86–6.59)    | 3.7 (2.15–4.61)        | -1.08 (-4.75–2.59)                                             | 0.23 (-1.39–3.75)                                               |
| <b>rCBV<sub>max</sub></b>  | 5.6 (1.85–14.14)      | 3.91 (0.75–10.04)  | 4.31 (2.97–7.63)       | -2.64 (-5.35–3.68)                                             | 0.4 (-1.91–6.88)                                                |
| <b>rADC<sub>mean</sub></b> | 1.15 (1.01–1.43)      | 1.12 (0.97–1.62)   | 1.12 (0.97–2.11)       | -0.05 (-0.3–0.22)                                              | -0.07 (-0.25–1.14)                                              |
| <b>rADC<sub>min</sub></b>  | 1.1 (0.81–1.43)       | 1.01 (0.82–1.34)   | 1.1 (0.88–1.01)        | -0.09 (-0.27–0.2)                                              | -0.01(-0.22–1.18)                                               |

**Table S3.** TV, CBV and ADC values before and during immunotherapy, in MGMT hyper- or unmethylated tumors.

|                                                           | MGMT status                 | aMRI-T0           | aMRI-T2                        | aMRI-T4                       | aMRI-T12         |
|-----------------------------------------------------------|-----------------------------|-------------------|--------------------------------|-------------------------------|------------------|
| Median TV (cm <sup>3</sup> )                              | MGMT Hypermeth.             | 3.2 (0–11.1)      | 2.48 (0–38.34)                 | 1.8 (0–7.5) <sup>e</sup>      | 3 (0–8.3)        |
|                                                           | No MGMT Hypermeth. (15pts.) | 5.2 (0.3–25.82)   | 6.92 (0.9–27)                  | 5.85 (0.2–20.72) <sup>f</sup> | 1.8 (0–7.51)     |
| <b>rCBV<sub>mean</sub></b>                                | MGMT Hypermeth.             | 4.1 (0.56–7.51)   | 2.21 (0.6–4.21) <sup>a</sup>   | 1.93 (0.85–3.58)              | 2.25 (0.7–2.64)  |
|                                                           | No MGMT Hypermeth. (15pts.) | 3.69 (1.26–9.45)  | 3.46 (1.51–8.66) <sup>b</sup>  | 3.76 (0.76–7.97)              | 1.93 (0.85–3.58) |
| <b>rCBV<sub>max</sub></b>                                 | MGMT Hypermeth.             | 1.49 (1.1–2.1)    | 2.63 (0.92–14.14) <sup>c</sup> | 2.39 (0.94–5.53)              | 2.78 (0.71–2.85) |
|                                                           | No MGMT Hypermeth. (15pts.) | 5.25 (1.94–10.55) | 3.9 (1.81–14.14) <sup>d</sup>  | 4.86 (0.74–10.04)             | 2.39 (0.94–5.53) |
| <b>rADC<sub>mean</sub></b>                                | MGMT Hypermeth.             | 1.13 (1.02–1.47)  | 1.11(0.76–1.34)                | 1.17 (0.96–1.46)              | 1.08 (0.94–1.6)  |
|                                                           | No MGMT Hypermeth. (15pts.) | 1.15 (0.81–2.6)   | 1.12 (0.83–1.95)               | 1.04 (0.83–1.62)              | 1.17 (0.46–1.48) |
| <b>rADC<sub>min</sub></b>                                 | MGMT Hypermeth.             | 1.08 (0.84–2.75)  | 1.01 (0.67–1.25)               | 0.96 (0.83–1.31)              | 0.96 (0.85–1.31) |
|                                                           | No MGMT Hypermeth. (15pts.) | 1.13 (0.69–1.61)  | 1.01 (0.81–1.47)               | 1 (0.67–1.34)                 | 0.96 (0.83–1.31) |
| ADC <sub>skewness</sub>                                   | MGMT Hypermeth.             | 1.76 (0.99–3.15)  | 1.85 (0.84–2.75)               | 1.71 (0.71–2.35)              | 2.42(1.07–4.47)  |
|                                                           | No MGMT Hypermeth. (15pts.) | 1.68 (0.85–2.44)  | 1.69 (0.93–2.37)               | 1.69 (1.18–2.21)              | 1.49 (1.1–2.1)   |
| ADC <sub>mode</sub> (10 <sup>-3</sup> mm <sup>2</sup> /s) | MGMT Hypermeth.             | 0.9 (0.3–2)       | 1 (0.3–1.3)                    | 0.7 (0.2–1.3)                 | 1.1 (0.1–2)      |
|                                                           | No MGMT Hypermeth. (15pts.) | 1.0 (0.4–1.9)     | 1.2 (0.6–1.8)                  | 1.0 (0.2–1.7)                 | 1.7 (1.1–2.1)    |
| ADC <sub>mean</sub> (10 <sup>-3</sup> mm <sup>2</sup> /s) | MGMT Hypermeth.             | 1.4 (1–1.7)       | 1.4 (1.3–1.7)                  | 1.3 (0.9–1.7)                 | 1.2 (0.9–1.3)    |
|                                                           | No MGMT Hypermeth. (15pts.) | 1.3 (1.1–1.7)     | 1.4 (1.3–1.7)                  | 1.5 (1–1.8)                   | 1.5 (1.2–1.9)    |

Note: a-b, p = 0.035; c-d, p = 0.035; e-f, p = 0.046.

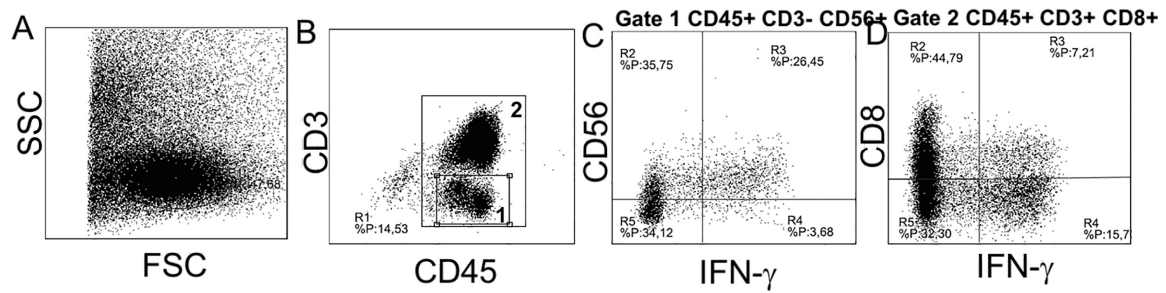

**Figure S1.** Flow cytometry assessment of active NK cells and CD8+ T cells; Representative dot plots show: (A) peripheral blood lymphocytes (PBLs) identified using Forward versus Side Scatter (FSC and SSC), based on size and granularity (complexity); (B) the gating strategy used to identify (1) CD45+ CD3- and (2) CD3+ CD45+ subset used to detect (C) CD56+ NK cells (Gate 1) and (D) CD8+ T cells (Gate 2) intracellularly stained with anti-IFN-g antibody.

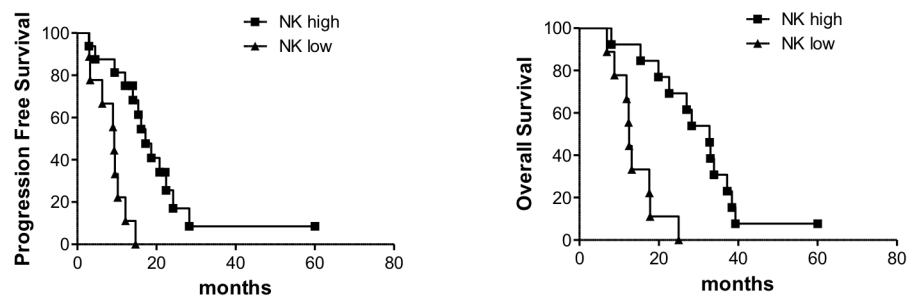

**Figure S2.** Meier curves display a significant correlation between high NK V/B ratio and prolonged survival, \*\*\* means  $p < 0.001$ .
